# Supplementary material
Source: MDPI journal article supplement (https://www.mdpi.com/2073-4344/12/8/867)

## **Supplementary Information**

### **2D Graphene sheets as a sensing material for the electroanalysis of zileuton**

Yogesh M. Shanbhag<sup>1</sup>, Mahesh M. Shanbhag<sup>2</sup>, Shweta J. Malode<sup>1</sup>, S. Dhanalakshmi<sup>1</sup>, Kunal Mondal<sup>3</sup> \* and Nagaraj P. Shetti<sup>1</sup> \*

#### **Figures and Tables:**

**SI Figure S1:** Nyquist plots for CPE and G/CPE in 0.01 mM ZLT

**SI Figure S2:** Influence of immersion time on the electrochemical behavior of ZLT

**SI Figure S3:** Impact of scan rate on the electrochemical behaviour of 0.01mM ZLT at  $t_{\text{imm}}$  of 0s in pH 6.0 (A) CV responses of 0.1 mM ZLT at different scan rates in pH 6.0 at G/CPE; Inset (a) Dependency and relationship of  $I_{\text{pa}}$  and  $I_{\text{pc}}$  with  $v$  (B) Dependency and relationship of  $I_{\text{pa}}$  and  $I_{\text{pc}}$  with  $v^{1/2}$ ; (C) Plot of  $\log I_{\text{pa}}$  and  $\log I_{\text{pc}}$  versus  $\log v$ ; (D) Plot of  $E_{\text{pa}}$  and  $E_{\text{pc}}$  versus  $\log v$

**SI Figure S4:** Study of influence and interference of (A) Excipients; (C) Metal ions; % signal change of ZLT under the influence of (B) Excipients; (D) Metal ions.

**SI Table S1:** AFM characteristics of CPE and G/CPE

| AFM Parameters               | CPE                                    | G/CPE                                  |
|------------------------------|----------------------------------------|----------------------------------------|
| Scan size                    | 10 $\mu\text{m} \times 10 \mu\text{m}$ | 10 $\mu\text{m} \times 10 \mu\text{m}$ |
| Total area of roughness      | 100.12 $\text{pm}^2$                   | 100.89 $\text{pm}^2$                   |
| Roughness average value (Sa) | 1.022 nm                               | 3075.9 pm                              |
| Root mean value (Sq)         | 4.540 nm                               | 12.759 nm                              |
| Peak value height (Sy)       | 238.51 nm                              | 29.22 nm                               |
| Peak height (Sp)             | 103.75 nm                              | 256.27 nm                              |
| Valley depth (Sv)            | -134.76 nm                             | -32.955 nm                             |
| Mean value (Sm)              | -5.707 fm                              | -4.777 fm                              |
| Delta Z value ( $\Delta Z$ ) | 958.9 pm                               | 2.776 nm                               |

**SI Table S2:** Characteristics of the plot of peak current versus concentration

| Parameters                                     | ZLT                                       |
|------------------------------------------------|-------------------------------------------|
| Linearity range (M)                            | $3.0 \times 10^{-7} - 1.0 \times 10^{-4}$ |
| The slope of the plot ( $\mu\text{A M}^{-1}$ ) | 0.131                                     |
| Intercept ( $\mu\text{A}$ )                    | 0.0869                                    |
| Correlation coefficient ( $R^2$ )              | 0.99                                      |
| SD of intercept                                | 0.0016                                    |
| % of RSD of slope                              | 0.017                                     |
| % of RSD of intercept                          | 0.019                                     |
| Total data points considered                   | 11                                        |
| $L_D$ ( $\mu\text{M}$ )                        | 0.03                                      |
| $L_Q$ ( $\mu\text{M}$ )                        | 0.12                                      |
| % RSD for repeatability                        | 0.78                                      |
| % RSD for reproducibility                      | 0.71                                      |

SI Figure S1:

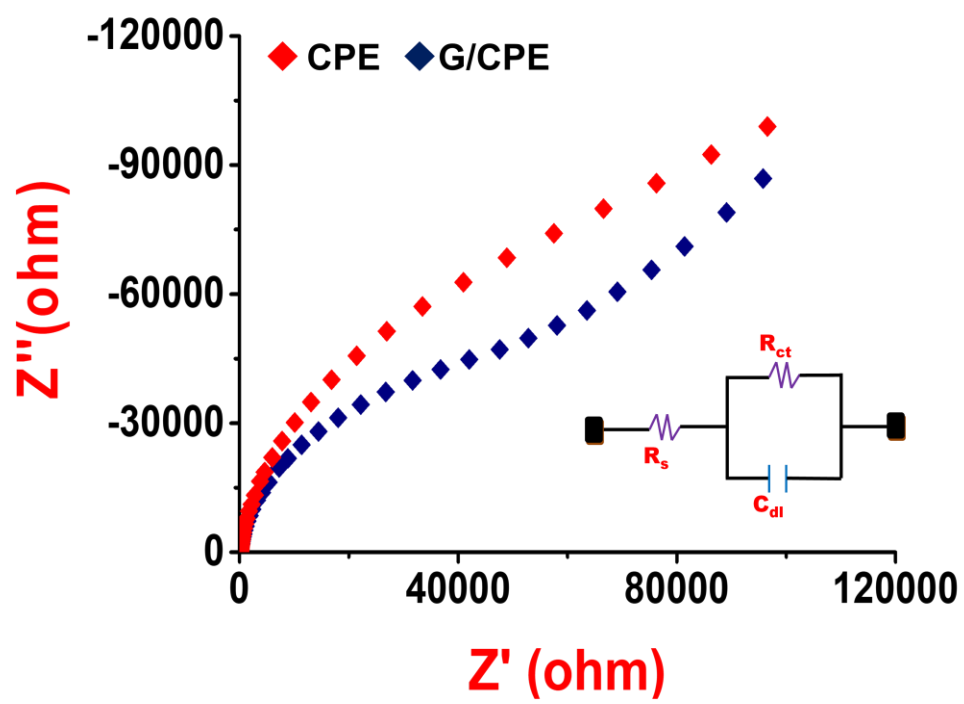

SI Figure S2:

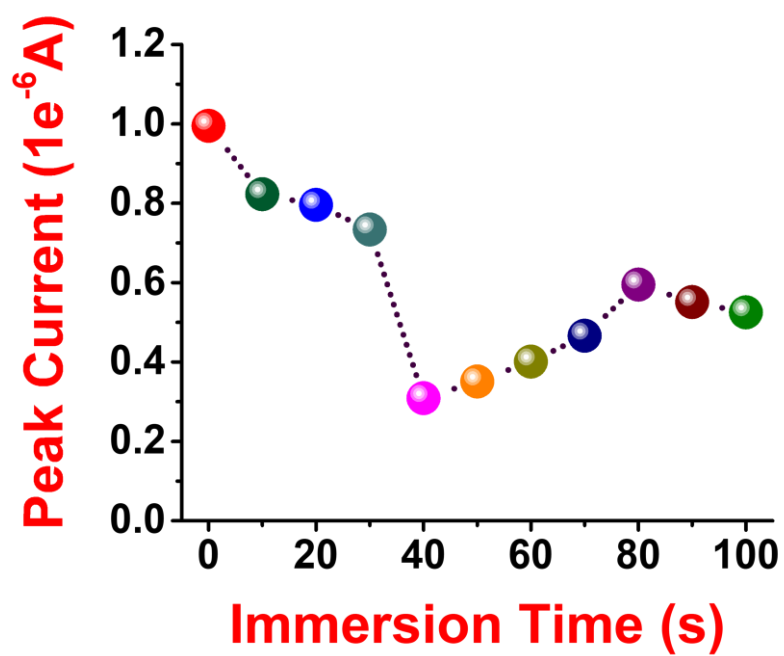

SI Figure S3:

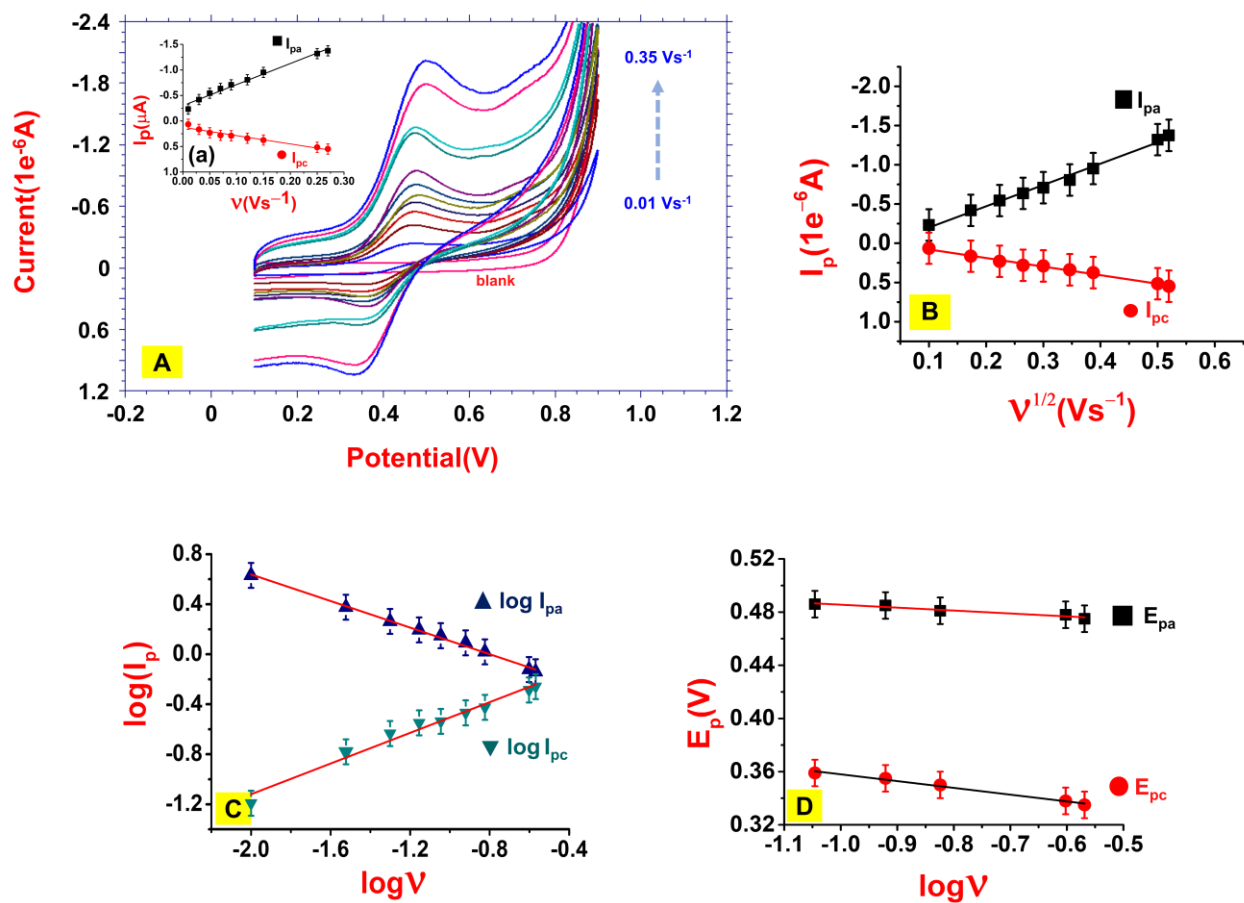

SI Figure S4:

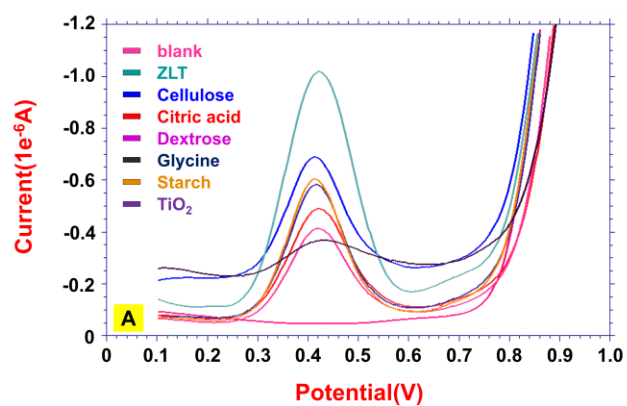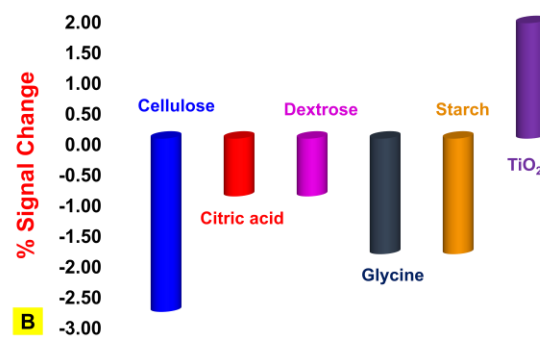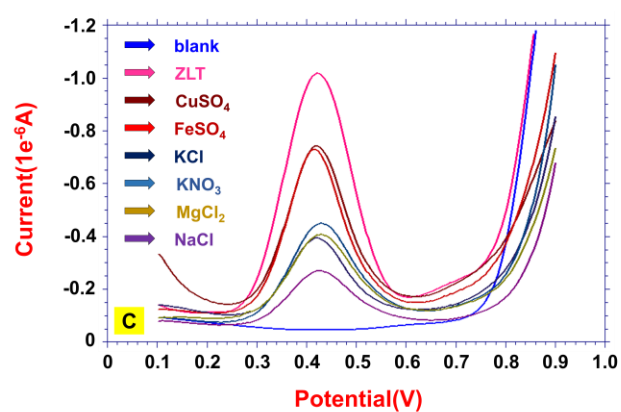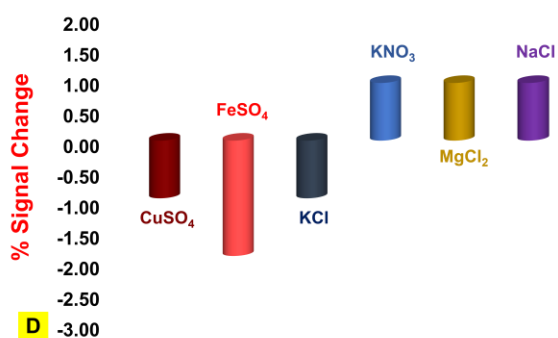

Supplement: s1 [file s1 › catalysts-1830923-supplementary.pdf]
